# Supplementary material for: SARS-CoV-2 shedding and evolution in immunocompromised hosts during the Omicron period: a multicenter prospective analysis
Source: PubMed Central journal article supplement — medRxiv. 2023 Aug 24:2023.08.22.23294416. Preprint. [Version 1] doi: 10.1101/2023.08.22.23294416 (PMC10473782; doi:10.1101/2023.08.22.23294416), 2023-08-24
Supplement: NIHPP2023.08.22.23294416v1-supplement-3.pdf [file NIHPP2023.08.22.23294416v1-supplement-3.pdf]

784 **Supplemental Table 1.** List of qualifying medications that are immunosuppressive,  
785 immunomodulatory, or myelosuppressive (see attached)  
786

787 **Supplemental Table 2.** Clinical, demographic, viral, and specimen data for enrolled patients  
788 (see attached)  
789

790 **Supplemental Table 3.** Output of Cox proportional hazards model for time to last positive SARS-  
791 CoV-2 rRT-PCR test  
792

|                                                    | Hazard Ratio | Lower 95% CI | Upper 95% CI |
|----------------------------------------------------|--------------|--------------|--------------|
| B cell dysfunction vs. Autoimmune/Autoinflammatory | 0.315        | 0.154        | 0.644        |
| Post-SOT/HSCT vs. Autoimmune/Autoinflammatory      | 0.597        | 0.38         | 0.939        |
| AIDS vs. Autoimmune/Autoinflammatory               | 0.282        | 0.08         | 0.996        |
| Malignancy vs. Autoimmune/Autoinflammatory         | 0.582        | 0.312        | 1.085        |
| Age                                                | 0.994        | 0.981        | 1.008        |
| Sex - Male vs. Female                              | 1.035        | 0.7          | 1.529        |
| Black vs. White                                    | 0.852        | 0.55         | 1.32         |
| Hispanic vs. White                                 | 2.049        | 1.002        | 4.191        |
| Other / Unknown vs. White                          | 0.671        | 0.269        | 1.672        |
| One or More Dose of Vaccine vs. Not Vaccinated     | 1.653        | 0.775        | 3.527        |
| Baseline Antiviral Use - Yes vs. No                | 0.878        | 0.572        | 1.35         |

793  
794 \* Variables included in the final model were immunocompromised group, age, sex, race,  
795 vaccination status, and receipt of antiviral drug at baseline (see Methods).  
796

797 **Supplemental Table 4.** Within-host divergence rates by gene for synonymous, nonsynonymous,  
 798 and stop-codon mutations  
 799

| Gene         | Mutation type  | Zero count (%) | Median divergence rate | IQR      | p-value*   |
|--------------|----------------|----------------|------------------------|----------|------------|
| <b>ORF1a</b> | Non-synonymous | 51 (58%)       | 0                      | 1.34E-06 | 3.56E-06   |
|              | Stop           | 85 (97%)       | 0                      | 0        | 1          |
|              | Synonymous     | 37 (42%)       | 1.89E-06               | 2.24E-05 | 7.37E-09   |
| <b>ORF1b</b> | Non-synonymous | 47 (53%)       | 0                      | 1.82E-06 | 7.55E-07   |
|              | Stop           | 87 (99%)       | 0                      | 0        | 1          |
|              | Synonymous     | 59 (67%)       | 0                      | 1.22E-06 | 8.11E-05   |
| <b>S</b>     | Non-synonymous | 51 (58%)       | 0                      | 8.94E-06 | 3.56E-06   |
|              | Stop           | 87 (99%)       | 0                      | 0        | 1          |
|              | Synonymous     | 53 (60%)       | 0                      | 4.07E-05 | 7.76E-06   |
| <b>ORF3a</b> | Non-synonymous | 82 (93%)       | 0                      | 0        | 1          |
|              | Stop           | 86 (98%)       | 0                      | 0        | 1          |
|              | Synonymous     | 82 (93%)       | 0                      | 0        | 1          |
| <b>E</b>     | Non-synonymous | 87 (99%)       | 0                      | 0        | 1          |
|              | Stop           | 88 (100%)      | 0                      | 0        | NA         |
|              | Synonymous     | 86 (98%)       | 0                      | 0        | 1          |
| <b>M</b>     | Non-synonymous | 77 (88%)       | 0                      | 0        | 0.11571878 |
|              | Stop           | 88 (100%)      | 0                      | 0        | NA         |
|              | Synonymous     | 83 (94%)       | 0                      | 0        | 1          |
| <b>ORF6</b>  | Non-synonymous | 85 (97%)       | 0                      | 0        | 1          |
|              | Stop           | 88 (100%)      | 0                      | 0        | NA         |
|              | Synonymous     | 85 (97%)       | 0                      | 0        | 1          |
| <b>ORF7a</b> | Non-synonymous | 82 (93%)       | 0                      | 0        | 1          |
|              | Stop           | 88 (100%)      | 0                      | 0        | NA         |
|              | Synonymous     | 87 (99%)       | 0                      | 0        | 1          |
| <b>ORF8</b>  | Non-synonymous | 81 (92%)       | 0                      | 0        | 0.67482814 |
|              | Stop           | 85 (97%)       | 0                      | 0        | 1          |
|              | Synonymous     | 88 (100%)      | 0                      | 0        | NA         |
| <b>N</b>     | Non-synonymous | 75 (85%)       | 0                      | 0        | 0.04985083 |
|              | Stop           | 87 (99%)       | 0                      | 0        | 1          |
|              | Synonymous     | 82 (93%)       | 0                      | 0        | 1          |

800  
 801  
 802 \* Wilcoxon signed rank test for difference in divergence rate (per site per day) vs. zero,  
 803 Bonferroni adjusted p-value

804 **Supplemental Table 5.** Consensus mutations in SARS-CoV-2 spike among 5  
 805 immunocompromised patients with  $\geq 2$  sequenced specimens and  $>56$  days of RT-PCR positivity  
 806

| Patient | Amino acid substitution | Spike domain* | Peak frequency (patient) | Date of peak frequency (patient) | Peak frequency (global) | Date of peak frequency (global) |
|---------|-------------------------|---------------|--------------------------|----------------------------------|-------------------------|---------------------------------|
| EV084   | W64R                    | NTD           | 99%                      | 6/2022                           | 1%                      | 6/2022                          |
| EV022   | D80G                    | NTD           | 91%                      | 6/2022                           | 1%                      | 4/2021                          |
| EV022   | F157L                   | NTD           | 70%                      | 6/2022                           | 18%                     | 2/2023                          |
| EV009   | S255P                   | NTD           | 99%                      | 2/2023                           | <1%                     | 2/2023                          |
| EV009   | R346T                   | RBD           | 99%                      | 1/2023                           | 94%                     | 4/2023                          |
| EV084   | K356R                   | RBD           | 100%                     | 7/2022                           | <1%                     | 11/2021                         |
| EV022   | L368I                   | RBD           | 65%                      | 4/2022                           | 90%                     | 4/2023                          |
| EV022   | S371P                   | RBD           | 100%                     | 7/2022                           | <1%                     | 1/2022                          |
| EV022   | S371F                   | RBD           | 100%                     | 7/2022                           | 97%                     | 11/2022                         |
| EV084   | T376A                   | RBD           | 82%                      | 5/2022                           | 97%                     | 7/2023                          |
| EV022   | K444N                   | RBD           | 100%                     | 6/2022                           | 2%                      | 11/2022                         |
| EV138   | K444N                   | RBD           | 100%                     | 9/2022                           | 2%                      | 11/2022                         |
| EV138   | G446R                   | RBD           | 89%                      | 8/2022                           | <1%                     | 2/2023                          |
| EV009   | G446D                   | RBD           | 100%                     | 10/2022                          | <1%                     | 1/2023                          |
| EV009   | N450D                   | RBD           | 99%                      | 7/2022                           | 3%                      | 11/2022                         |
| EV084   | N450D                   | RBD           | 99%                      | 6/2022                           | 3%                      | 11/2022                         |
| EV022   | L452M                   | RBD           | 100%                     | 7/2022                           | 2%                      | 6/2022                          |
| EV022   | L455F                   | RBD           | 70%                      | 6/2022                           | <1%                     | 8/2020                          |
| EV084   | I569T                   | SD1/SD2       | 99%                      | 6/2022                           | <1%                     | 7/2023                          |
| EV022   | R765L                   | none          | 71%                      | 6/2022                           | <1%                     | 2/2020                          |
| EV022   | T791I                   | FP            | 95%                      | 7/2022                           | 1%                      | 7/2021                          |
| EV022   | D936Y                   | HR1           | 99%                      | 7/2022                           | 2%                      | 4/2020                          |
| EV009   | D1139N                  | none          | 94%                      | 1/2023                           | <1%                     | 10/2020                         |

807  
 808 \* NTD = N terminal domain, RBD = receptor binding domain, FP = fusion peptide, HR = heptad  
 809 repeat.

810  
 811 † Global mutational data from GISAID, February 2020 – April 2022  
 812

813 **Supplemental Table 6. Neutralization FRNT50 of patient-derived viruses with serum pools**  
814

| Patient and Sample Day                   | New Spike Mutations * | Pre-Vax Pool 1 <sup>†</sup> | Post-Vax Pool 1 <sup>†</sup> | Pre-Vax Pool 2 <sup>†</sup> | Post-Vax Pool 2 <sup>†</sup> | Pre-Vax Pool 3 <sup>†</sup> | Post-Vax Pool 3 <sup>†</sup> |
|------------------------------------------|-----------------------|-----------------------------|------------------------------|-----------------------------|------------------------------|-----------------------------|------------------------------|
| EV138 day 20 (19 days post-bebtelovimab) | –                     | 68                          | 166                          | 38                          | 278                          | 574                         | 992                          |
| EV138 day 63 (62 days post-bebtelovimab) | K444N, G446R          | 16                          | 45                           | 23                          | 114                          | 137                         | 302                          |
| <i>Fold Change</i> #                     | –                     | -4.25                       | -3.7                         | -1.7                        | -2.4                         | -4.2                        | -3.3                         |
| EV009 day 91                             | R346T                 | 103                         | 111                          | 190                         | 13                           | 47                          | 44                           |
| <i>Fold Change</i> #                     |                       | ND                          | ND                           | ND                          | ND                           | ND                          | ND                           |
| EV022 day 13                             | –                     | 15                          | 45                           | 44                          | 92                           | 91                          | 230                          |
| EV022 day 82 (14 days post-bebtelovimab) | K444N, L452M          | 13                          | 33                           | 53                          | 114                          | 63                          | 253                          |
| <i>Fold Change</i> #                     | –                     | -1.2                        | -1.4                         | 0.8                         | 0.8                          | -1.4                        | 0.9                          |

815  
816  
817 Abbreviations: FRNT, Focus reduction neutralization test  
818 \* New mutations at >50% frequency relative to the initial sample from the same patient  
819 <sup>†</sup> Three pools of matched pre- and post-bivalent vaccination sera from xx individuals (pool 1), xx  
820 individuals (pool 2), and xx individuals (pool 3)  
821 # Fold change measured as the absolute reduction in serum neutralization in a patient's evolved  
822 virus relative to their initial virus

823  
824  
825

826

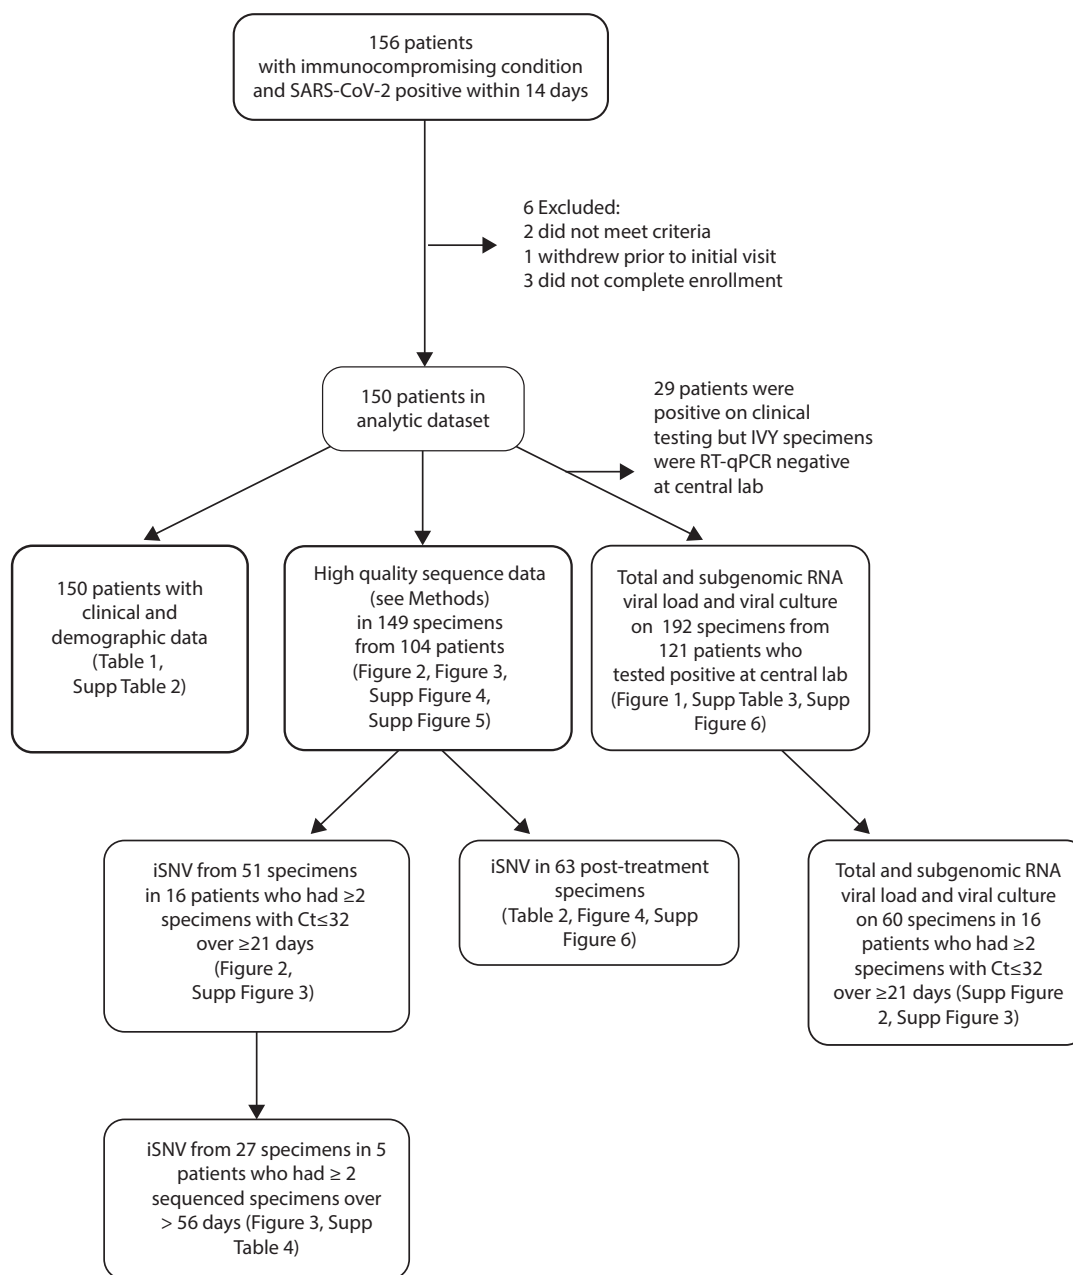

827

828

829 **Supplemental Figure 1.** Flow diagram of enrolled patients indicating patients and data included

830 in each analysis. iSNV = intrahost single nucleotide variants.

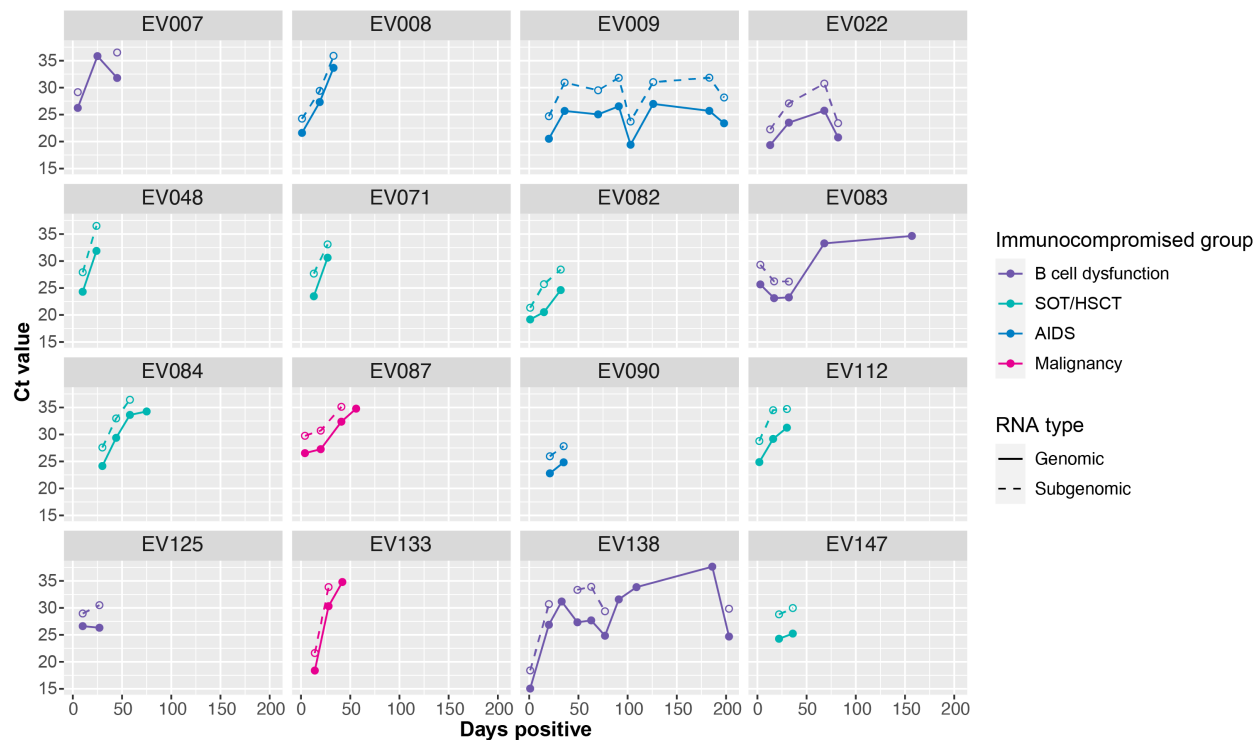

831  
832

833 **Supplemental Figure 2.** Plots show total (solid line, closed circles) and subgenomic N (dotted  
834 line, open circles) RNA viral load in serial specimens (day of infection, x-axis) for each of 16  
835 immunocompromised patients who had detectable viral RNA in  $\geq 2$  specimens spanning  $\geq 21$   
836 days. Lines and points are color coded by immunocompromised group: B cell dysfunction,  
837 purple; solid organ transplant (SOT) or hematopoietic stem cell transplant (HSCT), teal; AIDS,  
838 blue; non-B cell malignancy, pink; autoimmune/autoinflammatory, orange.  
839

840

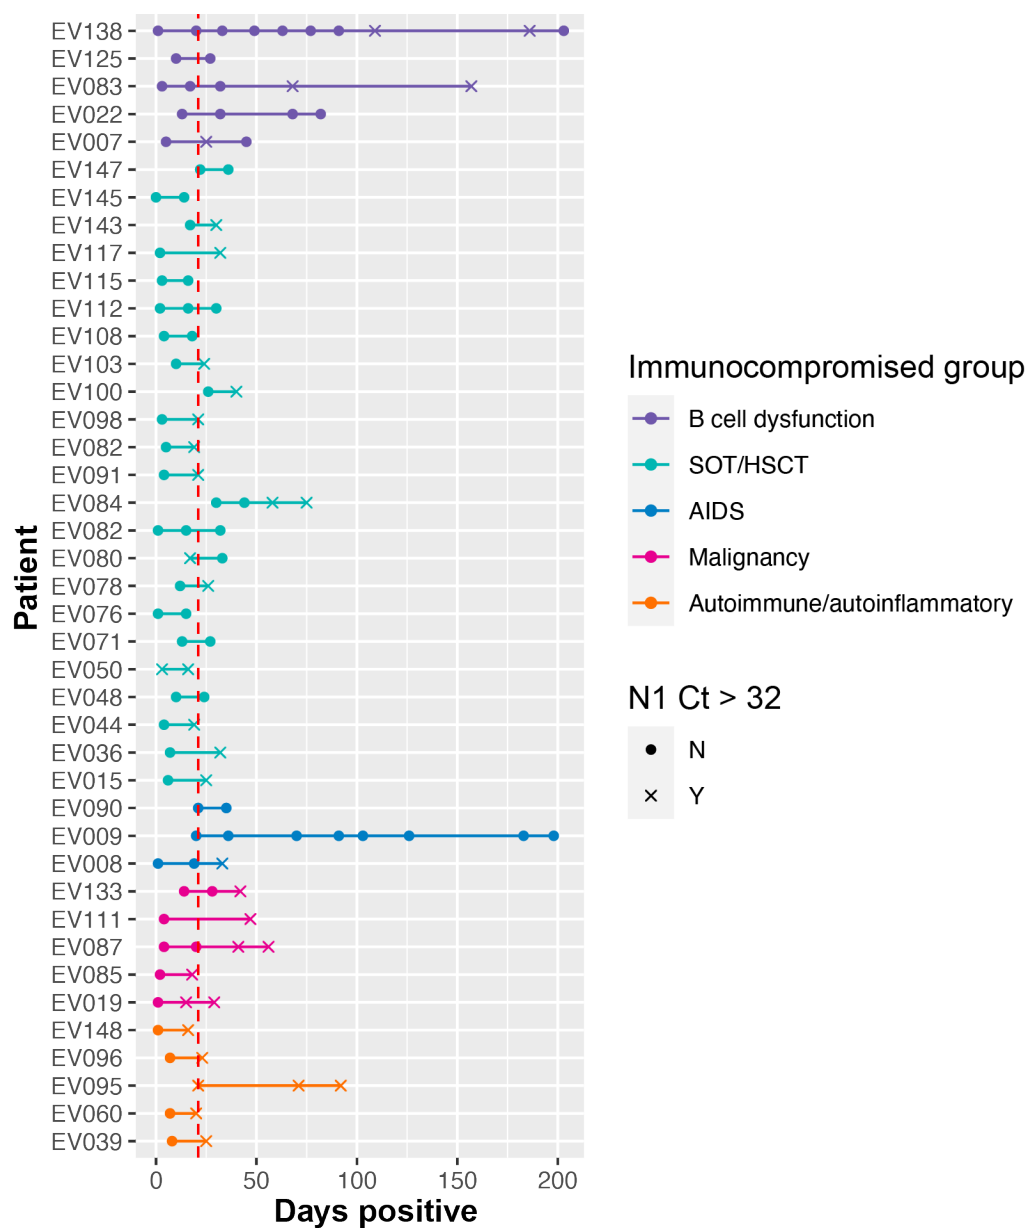

841

842 **Supplemental Figure 3.** Diagram identifying 16 patients with prolonged infection; defined as  
 843 patients who had  $\geq 2$  sequenced specimens with rRT-PCR Ct  $\leq 32$  spanning  $\geq 21$  days. Lines and  
 844 points are color-coded by immunocompromised group: B cell dysfunction, purple; solid organ  
 845 transplant (SOT) or hematopoietic stem cell transplant (HSCT), teal; AIDS, blue; non-B cell  
 846 malignancy, pink; autoimmune/autoinflammatory, orange. Filled circles indicate specimens  
 847 with rRT-PCR Ct  $\leq 32$  and x indicate specimens with rRT-PCR Ct  $> 32$ .

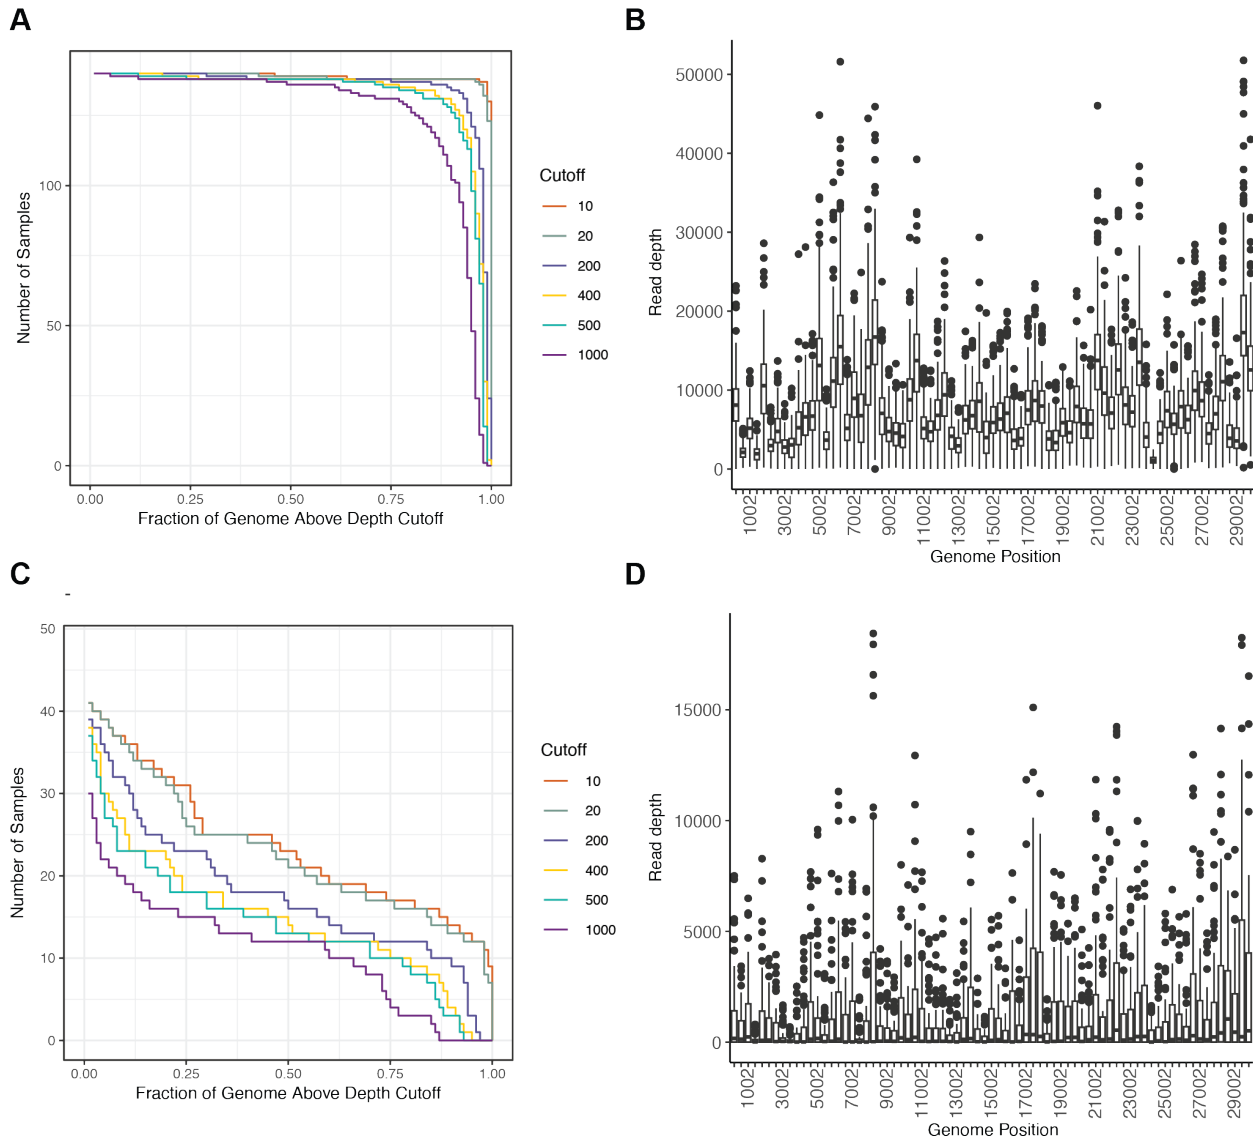

848

849

850 **Supplemental Figure 4.** Depth of coverage in sequenced specimens. Plots showing (A) number  
851 of specimens (y-axis) with fraction of the genome (x-axis) covered at the indicated depths (lines,  
852 legend) and (B) read depth by genomic position (sliding window) for 140 specimens with rRT-  
853 PCR Ct  $\leq 32$ . Plots showing (C) number of specimens (y-axis) with fraction of the genome (x-axis)  
854 covered at the indicated depths (lines, legend) and (D) read depth by genomic position (sliding  
855 window) for 52 specimens with rRT-PCR Ct  $> 32$ .

856



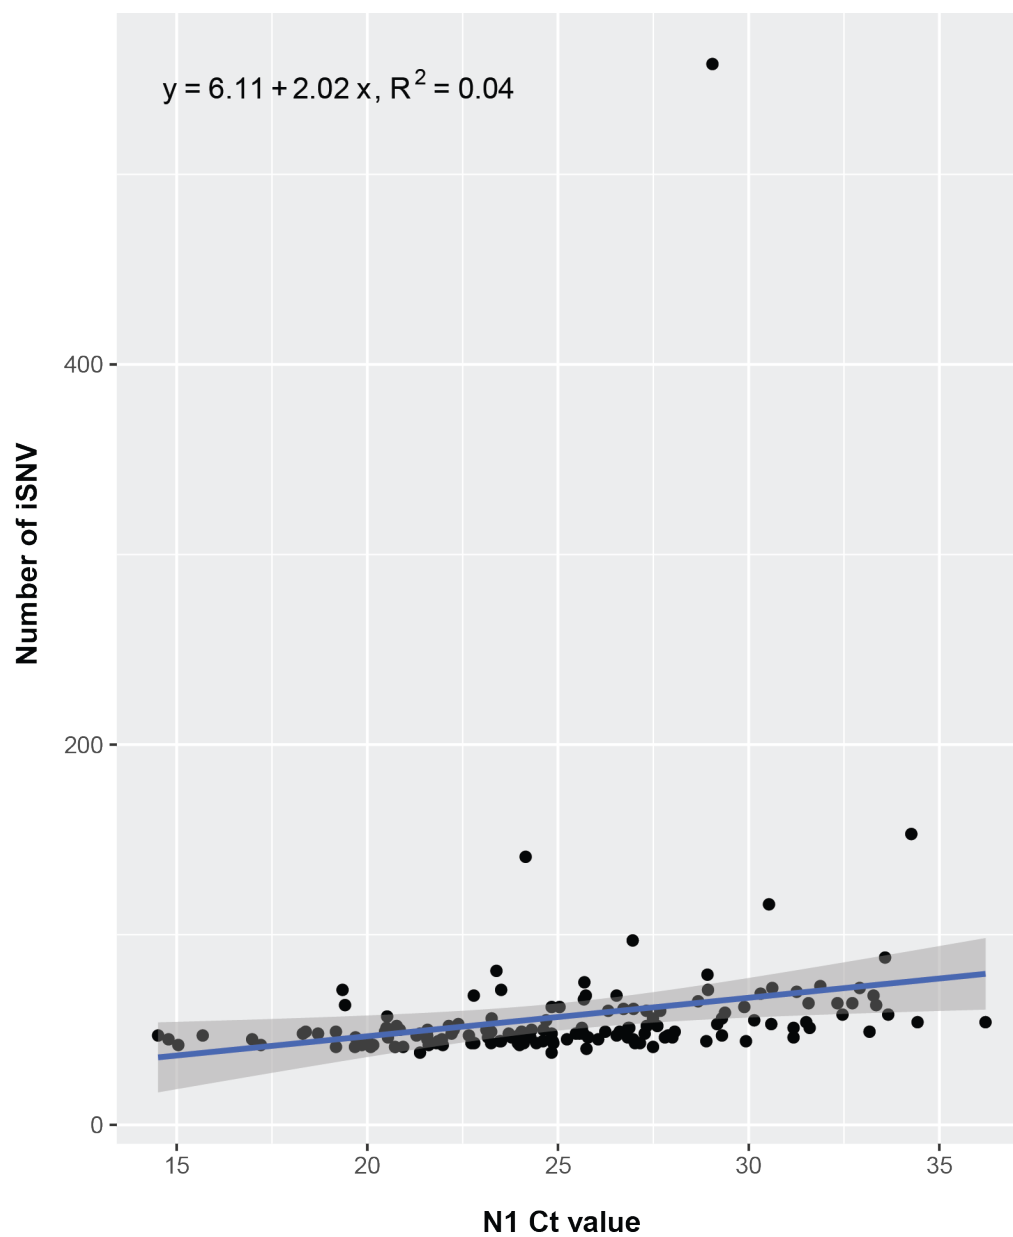

857

858

859 **Supplemental Figure 5.** Number of intrahost single nucleotide variants (iSNV) identified at 2-  
860 100% frequency (y-axis) per specimen (point) as a function of total SARS-CoV-2 RNA rRT-PCR Ct  
861 value. The regression line (blue), 95% confidence interval for the regression (shaded area), and  
862 the equation and R<sup>2</sup> for the regression are indicated. The outlier point with over 500 iSNV  
863 represents a single specimen from a patient previously treated with molnupiravir.

864

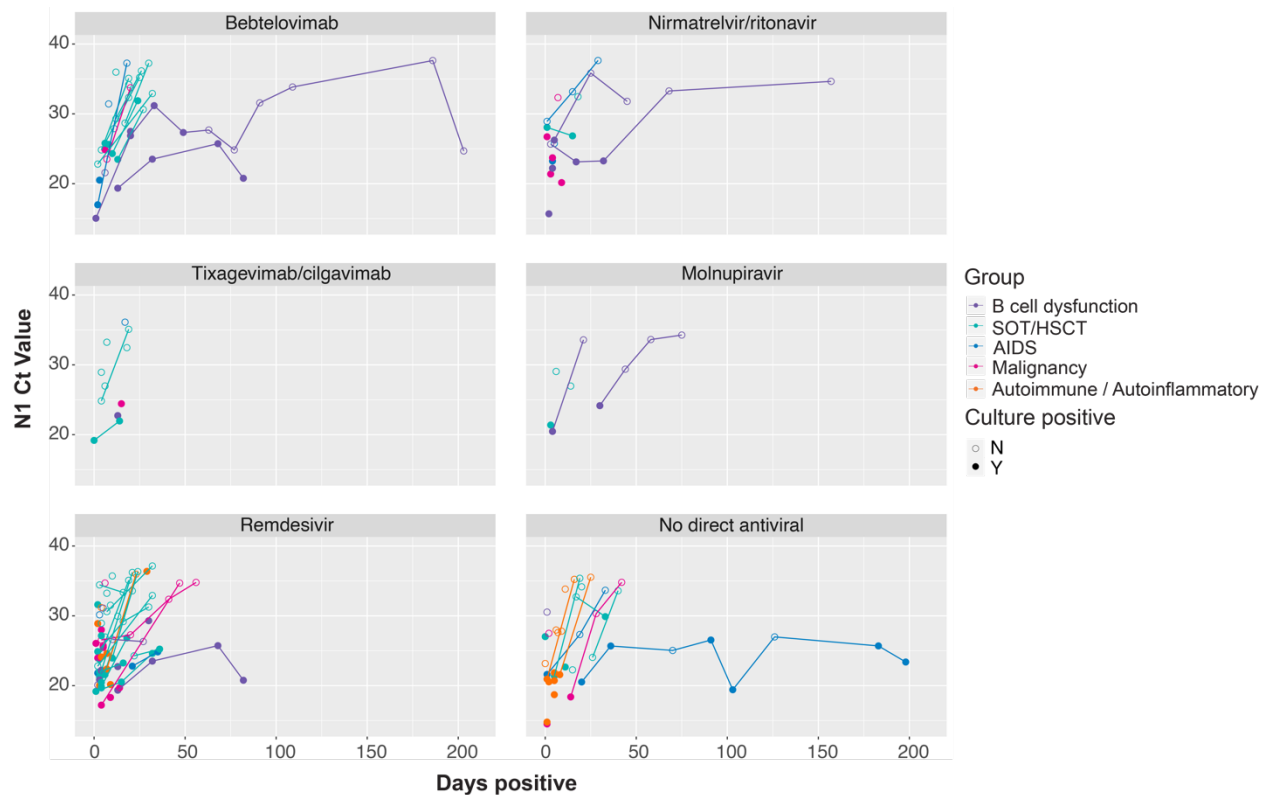

865

866 **Supplemental Figure 6.** Plot of SARS-CoV-2 total RNA rRT-PCR Ct values for the 115 patients

867 receiving indicated antiviral treatments. Lines and points are color-coded by

868 immunocompromised group: B cell dysfunction, purple; solid organ transplant (SOT) or

869 hematopoietic stem cell transplant (HSCT), teal; AIDS, blue; non-B cell malignancy, pink;

870 autoimmune/autoinflammatory, orange.
